# Supplementary material for: Controllable synthesis of micro/nano-structured MnCo2O4 with multiporous core–shell architectures as high-performance anode materials for lithium-ion batteries
Source: Royal Society of Chemistry journal article supplement (doi:10.1039/c5nj01497b), 2015-01-01
Supplement: c5nj01497b1.pdf [file c5nj01497b1.pdf]

Electronic Supplementary Material (ESI) for New Journal of Chemistry.

This journal is © The Royal Society of Chemistry 2015

## Supporting Information

Large-scale controllable synthesis of micro/nano-structured  
 $\text{MnCo}_2\text{O}_4$  with multiporous core-shell architectures as  
high-performance anode materials for lithium-ion batteries

Xiaoyu Wu, Songmei Li<sup>\*</sup>, Bo Wang, Jianhua Liu, Mei Yu

*Key Laboratory of Aerospace Advanced Materials and Performance of Ministry of  
Education, School of Materials Science and Engineering, Beihang University, Beijing,  
100191, P. R. China*

\* Corresponding author. Tel: +86 10 82317103; fax: +86 10 82317103.

E-mail address: songmei\_li@buaa.edu.cn.

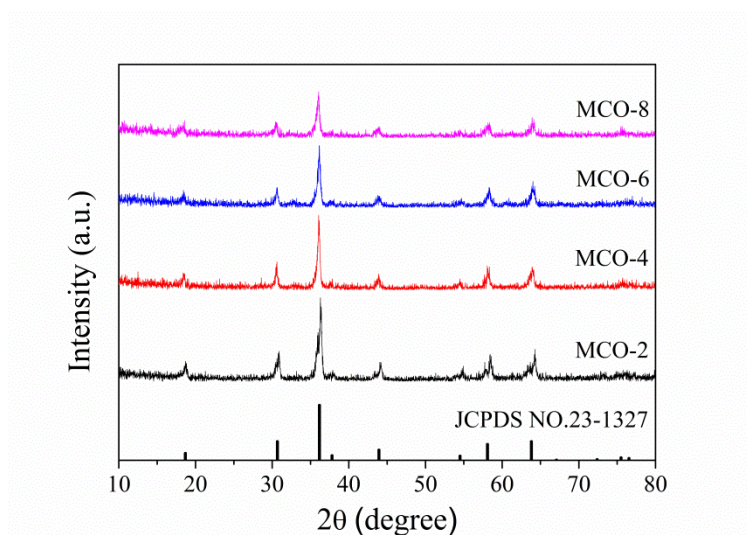

Fig. S1 XRD patterns of the various micro/nano-structured MnCo<sub>2</sub>O<sub>4</sub>

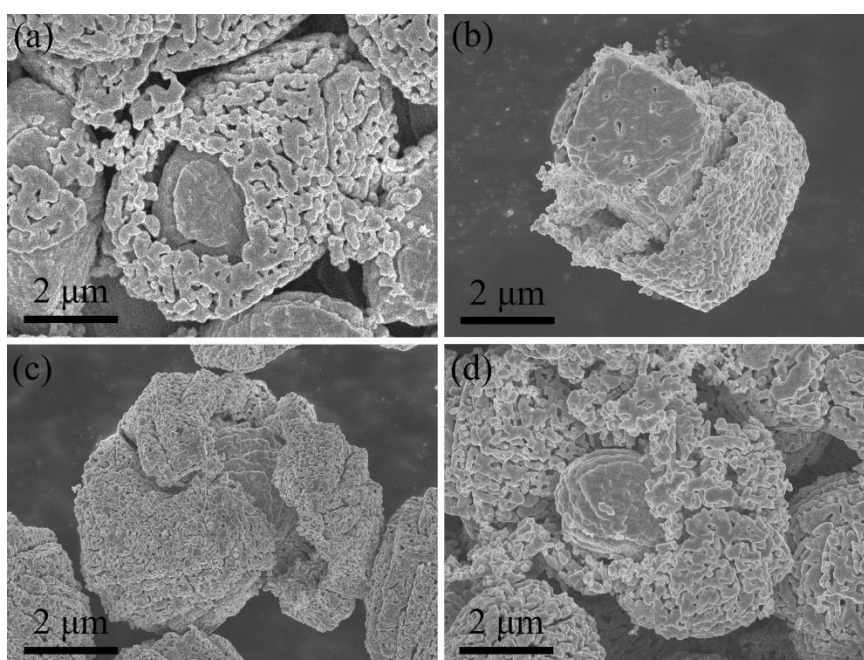

Fig. S2 SEM images of the various micro/nano-structured MnCo<sub>2</sub>O<sub>4</sub> with broken shells

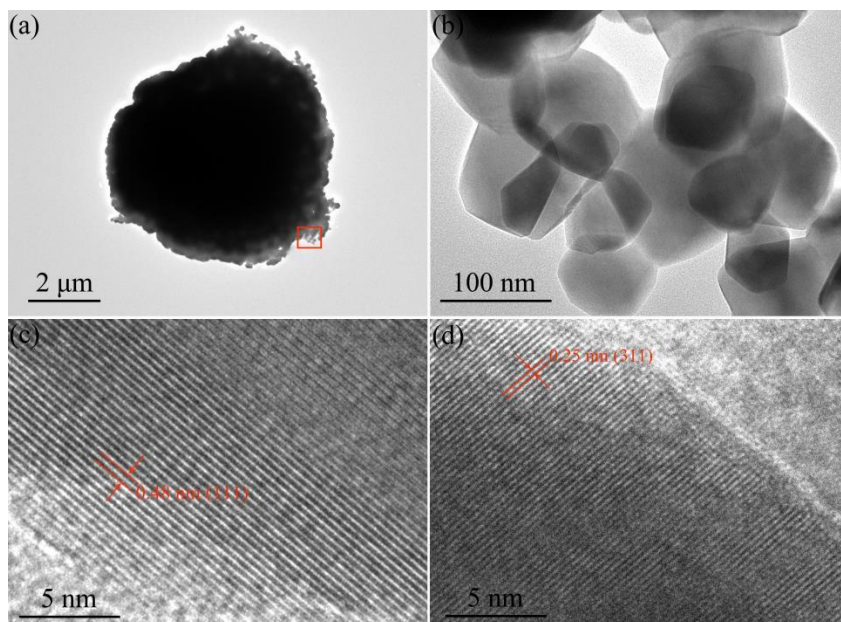

Fig. S3 (a, b) TEM and (c, d) HRTEM images of the  $\text{MnCo}_2\text{O}_4$  microspheres

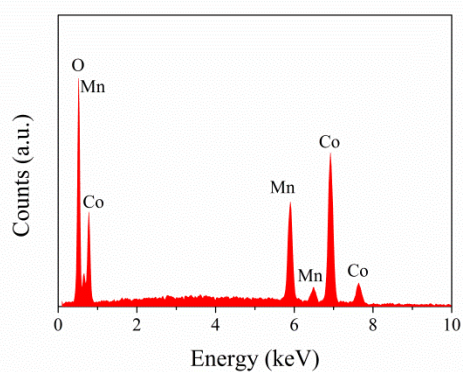

Fig. S4 EDS spectrum of the  $\text{MnCo}_2\text{O}_4$  microspheres

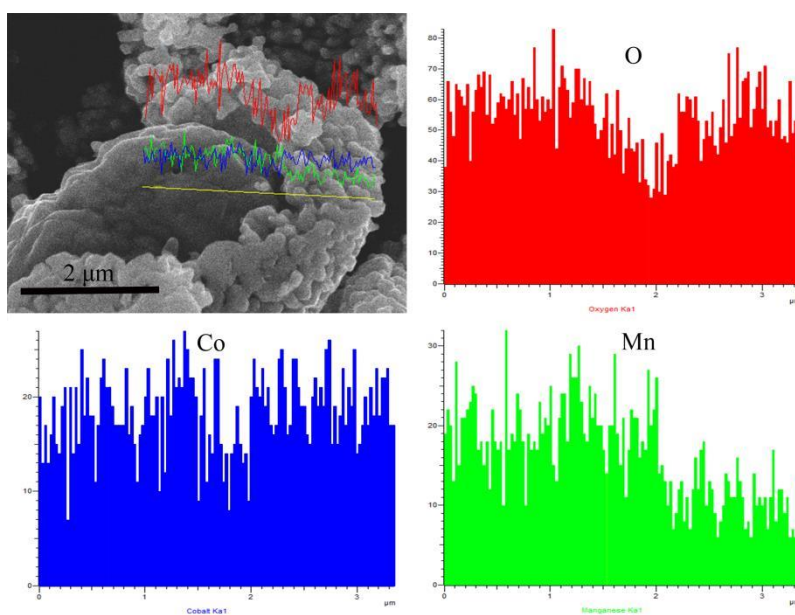

Fig. S4 EDS line-scanning results of the  $\text{MnCo}_2\text{O}_4$  products

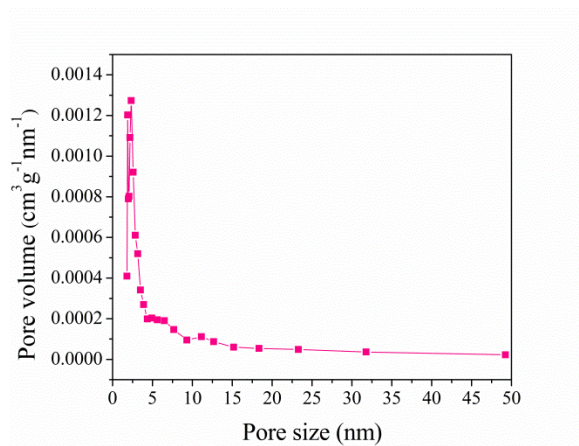

Fig. S6 BJH pore size distributions of the  $\text{MnCo}_2\text{O}_4$  microspheres

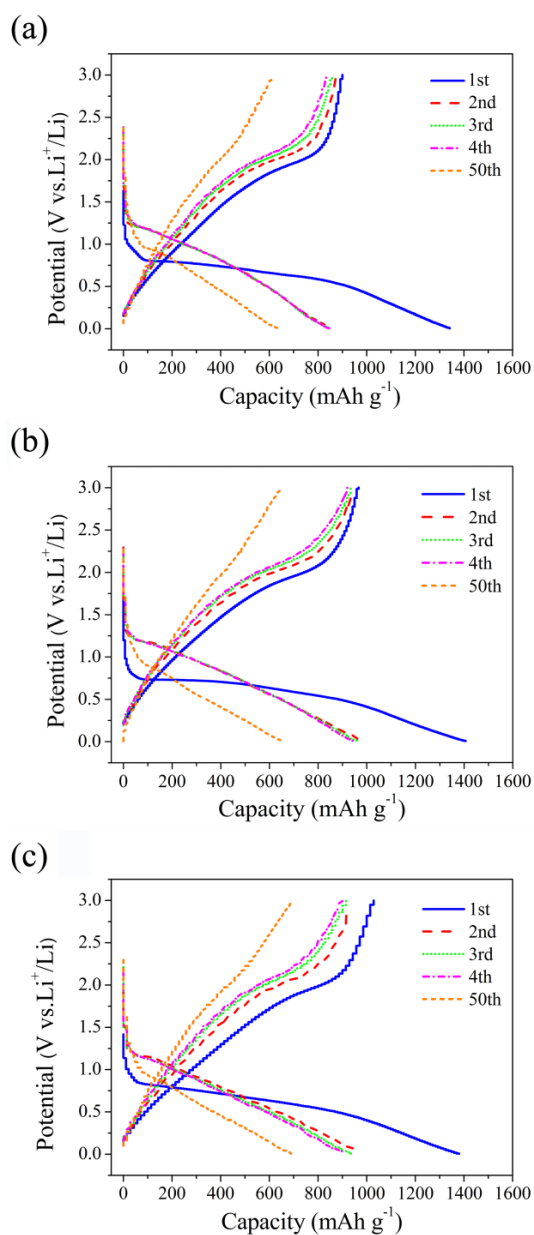

Fig. S7 Charge-discharge voltage profiles of the  $\text{MnCo}_2\text{O}_4$  (a) microellipses, (b) microcubes, (c) twin microspheres electrodes at a current density of  $400 \text{ mA g}^{-1}$

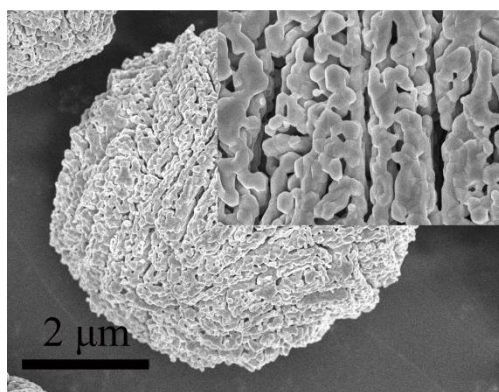

Fig. S8 SEM images of the MnCo<sub>2</sub>O<sub>4</sub> microspheres (the insert is the magnified SEM image of the surface of the MnCo<sub>2</sub>O<sub>4</sub> microspheres).
